# Supplementary material for: Multi-locational Evaluation of Forage-suited Selected Sudan Pearl Millet (Pennisetum glaucum L. R.Br.) Accessions Identified High-Yielding and Stable Genotypes in Irrigated, Arid Environments
Source: Preprints.org preprint supplement (doi:10.20944/preprints202403.1662.v1), 2024-03-27
Supplement: Supplementary file 1 [file supplementary]

## Sheet: Days to flowering
Table S1. Days to 50% flowering of 25 pearl millet genotypes grown in seven environments at Gezira (G1 and G2), Rahad (R1, R2 and R3) and Sinnar (S1 and S2) in Sudan
Genotype code	Accession number	Accession name	G1	G2	R1	R2	R3	S1	S2	Mean (G)
G01	HSD 2020-1	196/96	56.9998	51.2731	62	52.719	48.5863	55.3095	55.9316	54.6885
G02	HSD 2023-1	199/96	56.3064	50.463	67.3333	56.2128	46.6868	49.7388	56.1845	54.7037
G03	HSD 2027-1	203/96	55.5866	52.8669	63.4658	57.0207	53.6265	51.2619	55.2812	55.5871		G1	Gezira 2016/2017
G04	HSD 2031-1	207/96	54.941	51.0864	63.6265	57.7965	49.3333	51.2002	55.5588	54.7918		G2	Gezira 2018/2019
G05	HSD 2089-1	265/96	56.6279	53.3998	63.4978	58.0971	45.7269	52.4375	54.5618	54.907		R1	Rahad 2016/2017
G06	HSD 2096-1	272/96	56.6114	51.9724	68.6347	57.9058	53.3132	52.7545	55.3899	56.6545		R2	Rahad 2017/2018
G07	HSD 2106-1	282/96	57.6485	52.1328	67.3051	59.8958	47.6868	55.8073	55.9122	56.6269		R3	Rahad 2018/2019
G08	HSD 2142-1	318/96	56.1511	49.9357	63.5417	55.8558	51.8073	51.4859	55.2404	54.8597		S1	Sennar 2016/2017
G09	HSD 2146-1	322/96	56.8237	51.9431	62.2247	57.0011	51.1525	52.5179	57.5342	55.5996		S2	Sennar 2018/2019
G10	HSD 2152-1	328/96	56.7142	50.8751	68.811	56.7481	49.779	57.5141	55.0558	56.4996
G11	HSD 2159-1	335/96	56.8822	52.9524	66.0565	64.1859	52.1406	57.1406	57.2775	58.0908
G12	HSD 2162-1	338/96	56.1681	52.3624	70.0082	64.7351	51.9196	54.3051	54.8795	57.7683
G13	HSD 2175-1	351/96	55.9252	51.3199	63.7515	57.0572	49.0603	57.2969	56.2009	55.8017
G14	HSD 2216-1	392/96	51.4175	50.9516	62.4293	56.9687	47.9479	50.3772	55.3854	53.6397
G15	HSD 2222-1	398/96	55.9375	52.2479	63.3691	53.0289	49.7589	53.5945	56.6347	54.9388
G16	HSD 2224-1	400/96	56.0998	52.6508	68.4695	63.2223	54.3333	52.4777	57.7232	57.8538
G17	HSD 2227-1	403/96	55.3396	53.2885	65.6466	56.0364	54.5863	51.2247	58.6748	56.3996
G18	HSD 2231-1	407/96	56.3405	50.856	62.1927	56.4206	51.3534	53.8475	56.1124	55.3033
G19	HSD 2236-1	412/96	51.9623	49.2946	68.6146	57.6514	46.3534	52.904	54.9077	54.5269
G20	HSD 2240-1	416/96	58.074	52.2133	63.7031	58.1042	52.9077	56.6994	56.9799	56.9545
G21	HSD 2243-1	419/96	56.0437	51.9059	69.6667	59.0039	49.1607	50.1607	55.3051	55.8924
G22	HSD 2246-1	422/96	56.6367	54.9812	68.7991	57.2949	54.3534	48.8876	56.6786	56.8045
G23	HSD 2255-1	431/96	55.6314	51.7083	62.2016	58.5631	52.506	48.6146	54.2894	54.7878
G24	HSD 2262-1	438/96	55.7944	51.8217	68.3296	54.4669	50.1124	55.2693	55.6942	55.9269
G25	Baladi (Check)	Local cultivar	56.6414	51.413	59.6548	52.506	53.8073	50.506	55.6064	54.305
	Mean (E )		55.9722	51.8366	65.3333	57.5399	50.72	52.9333	55.96	55.7565

## Sheet:  Number of Culms
Table S2. Number of culms m-2 of 25 pearl millet genotypes grown at Gezira (G1 and G2) Rahad (R2 and R3) and Sinnar (S2)
Genotype code	Accession number	Accession name	G1	G2	R2	R3	S2	Mean (G)
G01	HSD 2020-1	196/96	36.879	33.5877	26.6171	36.0102	20.4728	30.7134
G02	HSD 2023-1	199/96	34.9954	44.4831	30.0552	33.9613	19.3935	32.5777
G03	HSD 2027-1	203/96	23.9416	32.5399	24.3919	36.7443	21.0556	27.7347			G1	Gezira 2016/2017
G04	HSD 2031-1	207/96	31.3781	36.9507	27.2971	37.2337	21.8506	30.942			G2	Gezira 2018/2019
G05	HSD 2089-1	265/96	37.8448	44.1963	24.5766	36.1351	19.9119	32.5329			R2	Rahad 2017/2018
G06	HSD 2096-1	272/96	24.801	34.4688	21.0253	35.9946	20.6467	27.3873			R3	Rahad 2018/2019
G07	HSD 2106-1	282/96	24.4502	30.5417	21.468	34.7085	18.8353	26.0007			S2	Sennar 2018/2019
G08	HSD 2142-1	318/96	40.2997	31.225	26.6822	35.7565	23.6303	31.5187
G09	HSD 2146-1	322/96	36.784	47.2499	23.8882	37.7219	19.1441	32.9576
G10	HSD 2152-1	328/96	32.7469	36.2482	23.3867	35.7067	19.7667	29.571
G11	HSD 2159-1	335/96	44.4886	34.5279	23.612	35.8271	19.6272	31.6165
G12	HSD 2162-1	338/96	37.3918	44.453	23.1191	30.0357	20.177	31.0353
G13	HSD 2175-1	351/96	33.6461	30.6307	26.5325	33.166	23.7264	29.5403
G14	HSD 2216-1	392/96	25.2642	29.2055	28.059	32.4995	17.3862	26.4829
G15	HSD 2222-1	398/96	23.2932	37.4664	23.5475	34.4864	20.0265	27.764
G16	HSD 2224-1	400/96	29.4211	32.0143	21.0268	37.5937	17.4931	27.5098
G17	HSD 2227-1	403/96	28.8491	34.1434	24.9937	39.4218	18.5326	29.1881
G18	HSD 2231-1	407/96	35.7119	39.5872	30.578	31.3409	19.0429	31.2522
G19	HSD 2236-1	412/96	35.4586	36.9101	29.1347	34.8649	14.7925	30.2321
G20	HSD 2240-1	416/96	35.1677	26.0815	26.0098	34.1385	22.5529	28.7901
G21	HSD 2243-1	419/96	36.0083	42.6129	25.2422	32.156	21.9663	31.5971
G22	HSD 2246-1	422/96	23.0586	39.6098	27.0373	35.9643	19.7302	29.08
G23	HSD 2255-1	431/96	21.1392	35.8649	26.0523	32.9123	19.8065	27.155
G24	HSD 2262-1	438/96	49.6407	44.2736	23.485	33.8516	17.0943	33.669
G25	Baladi (Check)	Local cultivar	34.8631	33.5541	24.4055	35.4553	16.6015	28.9759
	Mean (E )		32.7009	36.4971	25.2889	34.9475	19.7305	29.833

## Sheet: Plant height
Table S3. Plant height (cm) of 25 pearl millet genotypes grown in seven environments at Gezira (G1 and G2), Rahad (R1, R2 and R3) and Sinnar (S1 and S2)
Genotype code	Accession number	Accession name	G1	G2	R1	R2	R3	S1	S2	Mean (G)
G01	HSD 2020-1	196/96	165.509	165.504	143.81	155.726	149.953	154.474	142.668	153.949
G02	HSD 2023-1	199/96	170.4	166.141	147.384	151.731	155.805	159.274	149.633	157.196
G03	HSD 2027-1	203/96	176.269	157.484	147.115	141.873	157.879	161.87	140.958	154.778
G04	HSD 2031-1	207/96	170.534	160.249	148.923	155.35	154.92	151.645	151.345	156.138
G05	HSD 2089-1	265/96	165.694	163.286	139.597	146.19	159.548	153.76	134.801	151.839			G1	Gezira 2016/2017
G06	HSD 2096-1	272/96	168.068	170.42	142.859	148.042	157.22	167.905	162.583	159.585			G2	Gezira 2018/2019
G07	HSD 2106-1	282/96	165.013	154.782	164.027	157.57	159.002	166.377	146.16	158.99			R1	Rahad 2016/2017
G08	HSD 2142-1	318/96	173.351	162.757	152.541	156.759	149.529	158.954	147.751	157.377			R2	Rahad 2017/2018
G09	HSD 2146-1	322/96	163.845	161.05	154.811	154.699	164.826	162.356	139.238	157.261			R3	Rahad 2018/2019
G10	HSD 2152-1	328/96	178.812	156.12	145.204	154.353	155.903	163.1	143.62	156.73			S1	Sennar 2016/2017
G11	HSD 2159-1	335/96	172.939	154.378	155.81	150.904	152.311	156.399	145.234	155.425			S2	Sennar 2018/2019
G12	HSD 2162-1	338/96	177.959	165.742	132.442	147.57	161.072	171.821	157.018	159.089
G13	HSD 2175-1	351/96	174.629	154.104	147.722	150.07	157.215	168.44	150.08	157.466
G14	HSD 2216-1	392/96	164.682	168.513	153.048	157.529	152.686	148.767	138.298	154.789
G15	HSD 2222-1	398/96	172.803	156.496	147.393	151.017	149.411	167.858	165.616	158.656
G16	HSD 2224-1	400/96	151.114	151.038	158.197	163.635	152.965	152.251	145.92	153.589
G17	HSD 2227-1	403/96	147.166	162.826	146.348	151.235	155.042	155.031	154.799	153.207
G18	HSD 2231-1	407/96	161.864	161.642	144.852	149.58	155.937	164.586	144.962	154.775
G19	HSD 2236-1	412/96	166.116	162.738	148.901	150.292	158.694	163.684	149.797	157.175
G20	HSD 2240-1	416/96	172.723	154.717	151.242	151.613	155.022	167.794	147.404	157.216
G21	HSD 2243-1	419/96	169.941	161.74	146.04	149.4	147.707	169.08	140.3	154.887
G22	HSD 2246-1	422/96	167.271	162.99	157.14	159.286	154.989	149.336	157.823	158.405
G23	HSD 2255-1	431/96	168.892	142.291	138.644	156.05	153.177	161.072	146.658	152.398
G24	HSD 2262-1	438/96	161.887	167.117	147.554	148.783	151.5	163.52	132.688	153.293
G25	Baladi (Check)	Local cultivar	163.253	163.651	147.089	151.527	158.753	133.544	146.617	152.062
	Mean (E )		167.629	160.311	148.348	152.431	155.243	159.716	147.279	155.851

## Sheet: LSR
Table S4. Leaf to stem ratio of 25 pearl millet genotypes grown during 2016/2017 and 2018/2019 at Gezira (G1 and G2) and during 2016/17-2018/2019 at Rahad (R1, R2 and R3).
Genotype code	Accession number	Accession name	G1	G2	R1	R2	R3	Mean (G)
G01	HSD 2020-1	196/96	0.274204	0.234406	0.180742	0.142635	0.190004	0.204398
G02	HSD 2023-1	199/96	0.328055	0.249019	0.15474	0.204871	0.24536	0.236409
G03	HSD 2027-1	203/96	0.326579	0.307445	0.142533	0.217828	0.202134	0.239304
G04	HSD 2031-1	207/96	0.218788	0.261781	0.235079	0.175101	0.275244	0.233198			G1	Gezira 2016/2017
G05	HSD 2089-1	265/96	0.324946	0.270115	0.174688	0.187561	0.236906	0.238843			G2	Gezira 2018/2019
G06	HSD 2096-1	272/96	0.319377	0.305147	0.201851	0.193298	0.168575	0.23765			R1	Rahad 2016/2017
G07	HSD 2106-1	282/96	0.313003	0.246263	0.210536	0.185563	0.278987	0.246871			R2	Rahad 2017/2018
G08	HSD 2142-1	318/96	0.307229	0.264197	0.17951	0.209757	0.18716	0.229571			R3	Rahad 2018/2019
G09	HSD 2146-1	322/96	0.304037	0.261346	0.157485	0.215661	0.229565	0.233619
G10	HSD 2152-1	328/96	0.349942	0.296245	0.176706	0.250458	0.175123	0.249695
G11	HSD 2159-1	335/96	0.388732	0.261162	0.170317	0.203529	0.188356	0.242419
G12	HSD 2162-1	338/96	0.345044	0.265626	0.191529	0.218388	0.178268	0.239771
G13	HSD 2175-1	351/96	0.315006	0.297805	0.223451	0.154126	0.231923	0.244462
G14	HSD 2216-1	392/96	0.30287	0.259583	0.154506	0.235165	0.199138	0.230252
G15	HSD 2222-1	398/96	0.33679	0.270212	0.182468	0.131267	0.199382	0.224024
G16	HSD 2224-1	400/96	0.341647	0.277434	0.264322	0.273374	0.240923	0.27954
G17	HSD 2227-1	403/96	0.302838	0.303391	0.235467	0.180246	0.224306	0.24925
G18	HSD 2231-1	407/96	0.325699	0.304365	0.166538	0.168534	0.27477	0.247981
G19	HSD 2236-1	412/96	0.321034	0.279544	0.174764	0.15746	0.190727	0.224706
G20	HSD 2240-1	416/96	0.297602	0.330254	0.172829	0.173223	0.183514	0.231484
G21	HSD 2243-1	419/96	0.411181	0.283295	0.148502	0.231126	0.261239	0.267068
G22	HSD 2246-1	422/96	0.355644	0.374786	0.210763	0.231155	0.171619	0.268793
G23	HSD 2255-1	431/96	0.299154	0.313928	0.149257	0.205939	0.201574	0.23397
G24	HSD 2262-1	438/96	0.354732	0.289036	0.241587	0.17428	0.255633	0.263054
G25	Baladi (Check)	Local cultivar	0.301997	0.277616	0.214573	0.155006	0.224815	0.234802
	Mean (E )		0.322645	0.28336	0.18859	0.195022	0.21661	0.241245

## Sheet: Stem girth
Table S5. . Stem girth (cm) of 25 pearl millet genotypes grown during the seasons of 2016/2017 and 2018/2019 at Gezira site and 2018/2019 at Sinnar site
Genotype code	Accession number	Accession name	G1	G2	S2	Mean (G)
G01	HSD 2020-1	196/96	3.62222	3.82222	3.13333	3.52593
G02	HSD 2023-1	199/96	2.92222	4.07778	3.02141	3.34047
G03	HSD 2027-1	203/96	3.37778	4.2	3.16667	3.58148
G04	HSD 2031-1	207/96	3.58889	3.98889	2.96667	3.51481
G05	HSD 2089-1	265/96	3.11111	4.3	3.5	3.63704					G1	Gezira 2016/2017
G06	HSD 2096-1	272/96	3.37778	4.02452	3.53333	3.64521					G2	Gezira 2018/2019
G07	HSD 2106-1	282/96	3.55556	4.16667	3.46667	3.72963					S2	Sennar 2018/2019
G08	HSD 2142-1	318/96	3.53333	4.05546	3.5	3.69626
G09	HSD 2146-1	322/96	3.42222	4.27778	2.93333	3.54444
G10	HSD 2152-1	328/96	3.55556	3.9	3	3.48519
G11	HSD 2159-1	335/96	3.2	4.37778	3.3	3.62593
G12	HSD 2162-1	338/96	3.44444	4.03333	2.93333	3.47037
G13	HSD 2175-1	351/96	3.86667	3.64444	3.16667	3.55926
G14	HSD 2216-1	392/96	3.56667	3.95556	3.28226	3.60149
G15	HSD 2222-1	398/96	3.61111	3.97778	3.2	3.5963
G16	HSD 2224-1	400/96	3.21111	4.22222	3.53226	3.6552
G17	HSD 2227-1	403/96	3.48889	3.83669	3.23333	3.51964
G18	HSD 2231-1	407/96	3.36667	4.13333	2.92141	3.4738
G19	HSD 2236-1	412/96	3.2	3.77213	3.23333	3.40182
G20	HSD 2240-1	416/96	3.38889	3.98889	3.66667	3.68148
G21	HSD 2243-1	419/96	3.67778	4.12222	3.29633	3.69878
G22	HSD 2246-1	422/96	3.65556	4.2	3.13333	3.66296
G23	HSD 2255-1	431/96	3.41111	3.77002	3.23333	3.47149
G24	HSD 2262-1	438/96	3.35556	4.2	3.39633	3.65063
G25	Baladi (Check)	Local cultivar	3.22222	4.2	3	3.47407
	Mean (E )		3.42933	4.04991	3.23	3.56975
